# Supplementary material for: “You don’t do it for them, you do it with them” Policymaker Perspectives on Implementing Health Equity Frameworks across the European Union and United Kingdom
Source: Research Square preprint supplement (doi:10.21203/rs.3.rs-7494799/v1), 2025-09-11
Supplement: Supplementary file 1 [file 949e7064efd8ddc0a954b73d.docx]

# **Supplementary Materials**

# Additional file 1: Full quote dataset.

Format: DOCX.
Description: Complete anonymized quotations supporting the qualitative themes and findings reported in the Results.

| HEIF Domaain | Barriers (quotes) | Facilitators (quotes) |
| --- | --- | --- |
| culturally relevant factors of recipients | “in the design of frameworks, we often hear from the communities that it is very difficult to find someone who can relate to your situation... whether you are roma or you're a person of african descent... find a doctor who understands what that actually means” (participant 1)  “just being on prep might mean that you are a member of key population, even if you are not.” (participant 3)  “there are a lot of cultural barriers because of stigma in healthcare providers and also in policy makers, both in central level, in parliament, ministries and so on…” (participant 3)  “these frameworks often feel western europe-centric and disconnected from the realities of southeast europe. while eu-level principles are important, national teams need support to adapt them to their specific governance and cultural contexts. the distance and complexity of current recommendations make local relevance unclear—simplifying them is crucial.” (participant 5)  for example, if you're in a job where you're not officially hired, like many migrants working in greenhouses, you can’t afford to miss a day. you have to choose between your health and your livelihood. (participant 7)  “how often do you see black people actively participating in politics? representatives of migrant communities? or trans and generally lgbtqi+ people? it’s only recently that we’ve started to see a few trans individuals enter political spaces—but until now, there was almost no one because of the exclusionary, capitalist and colonial system that still continue to shape policymaking and health equiy” (participant 7)  people are very, particularly if you're already bigger, people are very embarrassed by those kind of things. so... so we don't have that kind of cultural acceptance. there's no kind of normalization of those sorts of physical activities and we don't have the right built infrastructure to support physical activity increase, much less the right financial incentives or costings.(participant 9)  “people know that if you're ill, there is a system there that will pick you up and you don't need to pay for anything. you pay for very little of it because they still perceive it as a free service even though it's covered from tax contributions, national insurance contributions from the public purse. so people just have perhaps a more carefree attitude towards their own health. because there is a system there that will pick things up for them when they become ill. . i've always been a great advocate of prevention rather than cure. but i think we have a system that is set up to be far too easy to access the cure. it's easier to access the cure than it is to consider the preventative measures you can take and even maybe access those preventative measures” (participant 9)  people who are working, it's very difficult for them to get out of work sometimes to access even a gp appointment. (participant 9)  “there was an lot of people coming from poland and we saw an lot of inner groupings. they probably wanted to integrate in the british culture, but they couldn’t. it's just because we didn't have very many polish speakers in the health service at that time, don't think, polish interpreters. that is probably being replicated now with a number of other communities coming in. they'll either embrace the british culture and seek to integrate, or they become very closed because of fear. xenophobia etc. so i think we have a lot of work to address around acceptance” (participant )  so it's always related to the colonial past of different colonial-like empires in france, i mean in europe, thinking about britain, france, spain, especially. portugal also, because brazilian people are very discriminated in portugal and not necessarily elsewhere in europe.. this may bring up some sort of more or less lower or higher level of sensibility to cultural differences, so people may be more open to understand cultural differences when they come from a cultural group which is not marginalized or stigmatized. (participant 10)  “sometimes the challenge of digitalization, because digitalization expects that people are happy to use the digital interface, whereas a lot of people want just to see the doctor or the nurse. people want to have a slightly less efficient services locally… available doctor or nurse, someone to consul” (participant 12)  “i was working for some time with some women...muslims who had to go to gynecological visits… they were actually from bangladesh. so i always asked to visit on a certain day and they would never go. then i changed the day and they went. why? because they said “ my husband has to bring me and this day works better for him” (participant 14)  “so you can think of, for example, white cis women with a lot of resources compared to women from the gypsy traveller community who have disabilities and very high levels of ill health. the main thing i would say is that a lot of the frameworks don't account for intersectionality… they look at things separately. there is always a danger that you don't think about things in terms of the causal pathway, so you're not looking upstream or that you end up favoring one dimension of equity over another.” (participant 15)  not everyone has the right to access health services simply because they are present in the territory. there are still many people—especially migrants—who are excluded. this reflects how formal access is insufficient; we need real, universal, and free access for everyone who resides in the country (participant 16)  “issues related to affordability are significant. while legal mechanisms exist to cover care for certain diseases, many conditions are not considered in that way. people often have to pay out-of-pocket, especially for preventive services like nutrition advice or screenings, which are not seen as priorities. when people have limited income, they may have to choose between essentials like glasses or the dentist and daily survival needs.” (participant 17)  “if you are displaced from another country, you don't have legal work, and you live in the street, you don't have the right. and in terms of public health, this is unsustainable. because, for example, infected disease don't ask for passports. they move from individual to individual.” (participant 13)  “nevertheless, imagine that people that pass through traumas, violence, hunger, know, the typical trajectory of someone migrating is full of this detention, loss of family members. these type of people are more likely to need to use some level of substances to keep up. denying them the health services, facilitate the use of illegal substances. they don't bring disease. they develop here the diseases. this is very important. ” (participant 13) | “cancer policies must consider how education level and socioeconomic status affect both access to care and risk exposure, ensuring inclusivity in prevention and treatment strategies. and advocacy is central in policymaking” (participant 1)  “it's just making sure that you're accessible and approachable and translating what we mean by health equity into something that's tangible for those other communities to buy into.” (participant 2)  “front of the pack labeling is important because everybody with different levels of literacy can understand what is in the product.” (participant 6)  “actually, the issue isn’t just communication—it's a lack of literacy, especially around one health. this isn’t just a minor gap; it’s a major challenge. improving one health literacy is essential, not only for the general public but especially for policymakers and decision-makers. strong governance and leadership depend on it.” (participant 2)  “community kitchens can play a key role in improving diet quality for low-income populations by offering healthy meals while integrating with broader social protection programs. these initiatives, part of broader health equity frameworks, can link food access with education, nutrition awareness, and local food systems, supporting both individual health and community resilience.”  “You've got a specific cultural context within the countries in terms of cultural and ethnic ones, which is kind of context dependent. there is no general rule about that” (participant 12)  “we need to think about what people really need. and what the communities need and what kind of services they would like to see further, rather than to kind of try to organise the health system in most efficient way.” (participant 12)  “thinking about, as i say, intersectionality but also the need for frameworks to build from the groups that already have agency and can speak up about implementation gaps and unmet needs… so that you can use them almost as nodes in a network to build capacity, to be clear about the responsibility of those who have agency, speak on behalf of those who do not, while building capacity, collaborating with and listening to and learning from those who do not yet have agency.” (participant 15)  “we have a phrase in scotland called refuigi and that means that you're one of us, you just happen to come from a refugee background. so if you live here, you're one of us.” (participant 15)  we need a health system that truly welcomes everyone and can adapt to different realities and needs. primary care, in line with the alma ata principles, should be accessible, person-centered, and adaptable throughout a person's life. it should accommodate people’s individual needs—such as adjusting appointment schedules—and ensure continuity of care. (participant 16)  “while when it comes to a kind of seeing it from the social determinants of health perspective, so acting via these, well, i don't want to even use the word supporting because to me they are essential policies, conditions for improving all people, all population groups, health outcomes is already another part of the story.” (participant 17)  “meaning that we need to design services that are fully empathetic to say there is no taboo. it's normal if you feel that you need to use something to get to the end of the day with all the concern, the extra naity, the blame you feel, you know, we really need and as i repeat, it is in our interests is in the interest of the society.” (participant 13) |
| clinical encounter | “certain medical equipment not being calibrated to people of a certain skin color” (participant 1)  “if you're  a black person in europe and you're going to a doctor and you would like to ideally find a doctor who is also black, who might have gone through the same experience as you entering a european country, this is often very difficult. that of course impacts how you’re treated and reduces trust a lot” (participant 1)  one of the barriers is that many key roles aren’t included in training—like administrative staff. when we talk about intercultural training, it shouldn’t just be for doctors and nurses. it should also include those at the front desk, because they’re often the first point of contact in primary care. many patients have already faced multiple barriers before even reaching a consultation. health care doesn’t start with the doctor—it starts much earlier. (participant 7)  “if i ever disclosed i was a male there'd be a lot of assumptions about behavior being a gay male… there's promiscuity for instance etc.” (participant 2)  “so yes, what is the environment in the service? is it a welcoming environment? do [you] feel safe? any of your friends or people who have gone there had bad experiences and they said that they were treated badly. and this is more specific of communities because of course, one straight man go there and feel perfectly safe and welcome, and then a gay man or a trans woman going to the same service and not feeling welcome.” (participant 3)  “look at the abortion. even in italy, we have a lot of gynecologists that are against the abortion, you know, and... yeah, it's effective because also people are getting more afraid to look for services or to look for access to services.” (participant 8)  “we are delivering on two healthy weight services, one for south asian communities because they don't engage in traditional weight management services and another service directed at men who again, i'm doing quite a lot of work around men's health at the moment and they just don't engage in the same way that women do, particularly with weight management services. they don't engage with any health care services generally. if you looked at all your gp statistics about who rocks up to a gp appointment, it will mostly be middle-aged women, very, very few men, particularly younger men, ever turn up to a gp appointment because they will never ring to book one because they don't think they... screening healthcare” (participant 9)  “training on equity often ends up reinforcing inequalities. those already aware and sensitized seek out training, while those holding biases or lacking awareness are often the ones who need it most, yet rarely receive it. equity training should be mandatory, not optional.” (participant 16)  "but also, i would say financial constraints would be difficult, but also the level of training of the staff in charge of delivering services. if they are not trained or not necessarily aware of the importance of the policy you are implementing.” (participant 10)  “professionals often prefer to work in a normal spaces in quotes, than in a marginal/rural areas” (participant 11)  “the is, from my point of view, very far away. if you don't encourage health professionals to in areas of difficult coverage, in rural areas, in marginal neighbourhoods, it makes people in those neighbourhoods have more difficulty accessing the health (participant 11)  “often, we unintentionally create barriers through our routines—like inflexible schedules, rigid treatment dynamics, or the way we manage patient interactions. these institutional practices can exclude people without us even realizing it. (participant 16)  “awareness raising among health professionals is no longer enough. they need to know how to act on data, how to apply it in practice, and how to collaborate with other sectors. without these skills, their ability to support equitable healthcare is limited.” (participant 17)  “they share some levels of stigmatization. so, for example, the ones that use drugs, let's imagine for recreational reasons and are integrated in the society, they may have difficulties in talking about the use of substances when they approach the health services, because this is considered something to blame… if you have people that live, for example, in the street, they do not have access to any type of services, if not the outreach services from the harm reduction programs, for example, and they may have several barriers to access health related issues. there is also an enormous self-stigmatization if [women] do [use substances]” (participant 13) | “alongside drafting clinical guidelines, we also focused on provider training and sensitization. in kazakhstan and kyrgyzstan, we ran unique sessions where two prep users, including myself, sat with clinicians to answer their questions—many had never spoken directly with a prep user before. it created a safe space to explore real concerns and build empathy. beyond training, we supported the implementation of differentiated service delivery, helping community organizations co-design hiv prevention services tailored to people’s needs and aligned with national guidelines—expanding access and choice.” (participant 2)  so if you're implementing something, what kind of skill building and support are you providing to those people who should be implementing your framework? (participant 5)  “not talking about hard-to-reach groups, but thinking my service is hard to reach. so why is my service hard to reach and how do i remove the barriers? i think that's important when we're thinking about service design and marginalised groups and going to those groups in most cases instead of expecting them to come to you” (participant 5)  “to put the money where it's most needed. i think we need to leverage more. incentives but i'm not sure what they will look like, some more incentives to take the preventative route because there is more money in the treatment route… but there should be more emphasis on preventon. there's a big driver from gps to get everybody onto a statin to prevent heart disease where actually if we exercise more, ate well, reduced our salt intake, managed our cholesterol and saturated fat intake, then we probably never need statins or very few of us would need statins by comparison to the numbers now.” (participant 2)  “it clear that for people who are in a street or drug addiction, is necessary to create certain devices are little more specific or make more concrete like the units that we here. i am thinking there are units in some hospitals for people with hiv who have problems with treatment, by street by... for different reasons. small structures that adapt better to their needs, but within hospitals or health themselves. as if they integrated into the system. (participant 16)  “people are not sclerotized into one situation, they move. so the services need to move with them.” (participant 13) |
| patient & community factors | “you don’t do it for them, you do it with them.. we need to change this” (participant 1)”  “in prep policy, for instance, it's just having that understanding of what the community is and what the community looks like that we're trying to work towards and what we're trying to achieve with that community, not on that community, you know, it's working with that community, not on them. you've got to think about your engagement approaches.” (participant 2)  “the main barrier is prioritization—deciding which issues matter most and who gets resources. while marginalized groups are known and represented in most eu countries, political will and government priorities often determine the extent of support and funding they actually receive.” (participant 4)  “i think that is a problem. if you are writing a framework, which is supposed to be something simple to follow and use, and i can't understand it, that means we have a problem because it's not going to trickle down well. how could someone else who's not in a, let's say, health policy space understand this?” (participant 5)  “when developing a health equity framework we should ask.. what do we actually mean here? what else could this mean to other people? how could someone else who's not in a, let's say, health policy space understand this?  and i think it all comes back to meeting the people that you need to be doing the work where they are, not doing that top down approach with language that is just too difficult to understand.” (participant 5)  “often, those who represent the population in health participation spaces come from associations—but most people, especially those most affected, aren’t part of any group. in health, there’s a common idea that only directly affected people should participate—for example, only members of a diabetes association should be involved in diabetes policy. but most people with diabetes in andalusia aren’t affiliated with any group, and they’re also surrounded by others—family, neighbors—who could bring valuable perspectives. participation shouldn’t just be about validating decisions already made; it must start from the beginning, during strategy design. simply sending out surveys isn’t enough—those methods often miss the most vulnerable. for instance, in national or european health surveys, the number of migrants or marginalized people included is extremely low. sometimes we base national data on just 20 people and present it as representative, which is misleading. the population is barely involved at all.” (participant 7)  “around the VCSFE.. can we just elbow in to your... your lovely little group and we'll just ask them lots of questions or we'll get your feedback on it but we're not going to pay you for that. we're just going to let you do the work that you're doing because you do it so well. you know your community.. ” (participant 9)  “we often expect people to come to us within healthcare when actually we probably need to get better at going to them” (participant 9)  "the fact that there is sort of belief that we know everything about the communities we are working on or with, and we don't necessarily need their view. we need just to discuss here and there with some people and that's it." (participant 10)  "i guess this is a good challenge and you know there is a sort of, since a while, have been a sort of tendency, let's say, i don't know what to call it, but to include communities in the, not only in the evaluation but also since the beginning, like in the design of public policy in general." (participant 10)  you can't think that a certain population of lgtbqi+ will take account certain practices. if you don't have an approach, via associations, via other people who are lgbtqi+, via services that access the spaces where normally are. (participant 11)  “it's very easy for these implementation frameworks to slip into just solving immediate problems and just having individual level behavioral interventions… and not constantly thinking about how do we redesign the system.”(participant 15)  “so there's another uphill struggle which is about seeing who's not there. when i was training in public health, we were taught very clearly to understand who is not there as well as who is there.”(participant 15)  “it clear that for people who are in a street or drug addiction, is necessary to create certain devices are little more specific or make more concrete like the units that we here. i am thinking there are units in some hospitals for people with hiv who have problems with treatment, by street by... for different reasons. small structures that adapt better to their needs, but within hospitals or health themselves. as if they integrated into the system.” (participant 16)  "we don't really have any like, you know, like a toolkit even or checklist like this and that and whatever. it's just a kind of very often intuitive while i think organizations such as ourselves... could benefit greatly from having it a bit more central" (participant 17)  “participation is one of the most neglected areas. we, as institutions and professionals, are often not involved in participatory processes ourselves, yet we expect people to participate in ours. if we don’t foster participation in everyday practice, how can we expect people to engage meaningfully when it matters?” (participant 16)  “we often try to understand communities through academic articles, but without speaking directly with people or understanding their realities, we miss key insights. we must acknowledge that they are the true experts of their own lives.” (participant 16)  “we do not have formal toolkits or checklists for community participation. engagement often relies on intuition. there is a need for more structured and embedded community participation mechanisms in health equity frameworks and organizations.”  (participant 17)   |  | | --- |  |  | | --- | | “health equity frameworks must be co-designed with marginalized communities, ensuring they have a paid seat at the table to shape solutions that reflect their lived realities” (participant 1)  “advocacy must highlight how marginalized communities face greater climate risks, such as proximity to flood zones or chemical plants, and push for instance for inclusive environmental policies” (participant 1)  “let the community tell them, tell us who they are and what's important to them and what they're here for. don’t assume just because you have a gay migrant in front of you the sexual behavior this person is having. let them tell you.” (participant 1)  “when i began coordinating x sexual health, the action plan proposed adding two young people to our advisory board to represent all youth voices. i pushed back — it didn’t feel equitable. meetings were during school hours, and two individuals couldn’t represent wales’ diverse young people. instead, we partnered with youth services to collect feedback on sexual health topics like hiv stigma. over 500 marginalised youth participated, offering deeper, more representative insights. it showed how community-rooted engagement can lead to more equitable policymaking.” (aj)  “for trans people, what usually matters most is hormone therapy. if we offer them just hiv testing, they say, not really interesting, not really my priority. my priority is another one. but instead, if we provide hiv testing in the clinic where they go for hormone therapy, then hiv testing is much more accessible. because it's there where they are. we need to create policies that take into consideration where the community is and what services they need” (participant 3)  “i'm someone who really values community participation and voice in structures. but we need to move beyond siloed thinking toward a multisectoral approach—projects affect housing, education, work, and access to services. different departments must coordinate more through health impact assessments and policy integration, though this collaboration rarely happens in practice.” (participant 4)  “we also train community-based organizations and community health providers on these services… to help them actually with our experience and seeing and looking at other services, know, design a new service that responds to the needs and preferences of the populations” (participant 3)  “understanding where people are in their lives and using participatory approaches to involve them in policy design makes a difference. when interventions are built with input from those experiencing marginalization, they are more likely to be seen as useful and adopted. people feel ownership and are more likely to engage with the measures.” (participant 17)  “we should be moving towards place-based community-led initiatives and place-based governance simply because from where i sit in the rural kind of health space, context is key. they often have the local knowledge” (participant 5)  “this there's a lot of talk in the uk at the moment about place-based initiatives so working to a particular geographical area so that you can meet the needs of that area in a smaller way. there is this nasty habit in the uk where i have seen the system go from let's do it in little, small pockets to no. no, let's do it in big no. no, that's not working. let's go back to small. let's go to medium. let's go to big. let's go to small it's just a continual concertina i personally think the small place-based approaches are going to be the most successful.” (participant 9)  “i think local policy is a key facilitator. it’s at the local level where political action is easiest to implement—legislation is important, but the closer it is to the ground, the more effective it tends to be” (participant 2)  “at the same time, grassroots awareness is just as important. we’re encouraging one health education in schools and among students. i was recently impressed by a webinar in lombardy, italy, where veterinarians discussed one health—this kind of professional engagement is key.” (participant 9)  “we need to include people who are stigmatized. sometimes they are themselves formal uses of drugs, for instance, or it might also be the case for some organizations working with sex workers. so you need to involve everyone since the beginning and work to build trust between all the stakeholders." (participant 10)  public health must be community-based, otherwise we won't get there. so, equity must be community-based as a fundamental to try to inequalities. (participant 11)  “whenever we could… we worked with on-the-ground organization and individuals who were the informal community leaders. so the formal and the informal and the third sector organizations to find out what needed to change… it's vital that one of the things to address the implementation gap is people have to walk through the pathway alongside the people with the greatest burdens in order to understand how to address these implementation gaps.”” (participant 15)  “participation—such as engaging with local councils—is one of the key factors they identify for maintaining the sustainability of projects and intersectoral work. it helps make these processes independent of political shifts. every four years, elections take place, and with changes in political leadership, ongoing initiatives are often abandoned or altered. therefore, participation is fundamental for ensuring the continuity of these processes and, ultimately, for achieving equity (participant 16)  “community engagement and participation in designing policies and interventions is essential. whether at the eu, national, regional, or local levels, this involvement is seen as increasingly important and is becoming an expected standard of practice.” (participant 17)  “municipalities are best positioned to understand real-time community needs and respond quickly. their engagement is vital for service delivery, crisis response, and building a healthier, more inclusive local economy.” (participant 17)  “we need to find the right language. when i started, probably i could enjoy the privilege of talking about science. nowadays, we need to be able to talk about science with an advocacy capacity. to be able to say to people, i respect your political position. i assume that we have the same outcomes in mind, that is keeping people alive, living in a safe community, enjoy our life together. believe. this is what we need to do.” (participant 13)  “there is another technique we are implementing in my agency that is expert elicitation, where you listen to the expert, but you ask them to measure how certain they are about their statement.” (participant 13)  “now we call them expert by live experience. so it's not just patient, but are people that know, are experts by lived experience.” (participant 13)  “what should we do is to facilitate the access of, for example, migrants to the society, to the real positions in the society, to the job market, so that you wouldn't need to create strange engineering things. give them access to the position, to the public services, for example, not only as users, but as employees.” (participant 13) |
| innovation characteristics (clarity, fit, usability, adaptability, evidence) | “there is not really any interest or drive to collect this kind of inequality data generally, let alone for health specifically” (participant 1);  “there is definitely a need for some form of joint language, allowing you to speak the same language when you're talking about racism, discrimination and health and how it should be addressed. so we should definitely also spend some time on trying to find a common language” (participant 1)  “there is confusion on the definition of health equity and inequality. health equity isn’t about making everyone equal—it’s about ensuring fair access to care so people can achieve their best health, regardless of their starting point. when we introduced prep in nhs wales in 2016, the challenge was ensuring it reached all at-risk groups—not just gay men—because equity means considering every affected population, not just the most visible.” (participant 2)  “public health language is often too complex, limiting public engagement and understanding. accessible communication is critical to achieving community-level buy-in.” (participant 2)  “what do you mean by health equity frameworks? we policymakers should address this question first” (participant 5)  “if you don’t have the data, what are you basing your policy on? so if it’s not data, it’s just beliefs or political priorities that might not be effective on the ground.” (participant 3)  “the possibility to bring something in the court, because if it’s just policy or strategy, this cannot be enforced. on the other side, what should civil society should advocate for is about enforcement” (participant 3)  “health equity frameworks should use different language for different audiences. whether advising ministers or working with frontline staff like personal advisors in local authorities, i’ve always made an effort to speak in ways that are accessible and relevant to each group. it’s about meeting people where they are—ensuring the message on health equity resonates at every level. again, i think it is still too technical—health equity frameworks generally, to be honest….” (participant 2)  “from the rural health equity side, a key issue is the number of metrics in these frameworks—many aren't contextually relevant or usable due to lack of local data. ongoing monitoring and evaluation is often overlooked—it shouldn't just happen at the end or every five years. smaller organizations and local authorities are frequently expected to both deliver services and produce lengthy reports, which can shift the focus from action to excessive documentation.” (participant 5)  “decision makers like statistics and numbers and seeing the graphs and that's very difficult to do at the moment for rural areas, for instance” (participant 5)  “but we have seven miles of coastline that's pretty much dedicated to the tourist industry, the visitors. and most of the locals won't use it. because they don't perceive it as theirs. so we can't get people out and doing physical activity. none of our infrastructure is set up to enable people to take nice routes to walk to the shops or to access those spaces in a meaningful way to them. so inevitably our physical activity rates are significantly lower than the english average” (participant 9)  “i am thinking especially in the case of france where there is no ethnic statistics produced at the national level, so you're not allowed as a public service to collect data on ethnic background of people. so in these sort of cases there is no ethnic statistics in terms of that could allow you to see the difference between different ethnic groups in different aspects. but in other countries, there is, like in britain, are ethnic statistics, but i don't know, probably this is at a national level. but when it comes to different local initiatives that not necessarily collect all the data.  (participant 10)  “we are quite good sometimes to kind of collect the data and show the kind of inequalities, but then not acting upon them.” (participant 12)  the things that have worked in the short term… they haven’t permanently changed the way we design services… there’s a tendency even when you start out to redesign things… over time things become a little bit more and you end up with trying to put in place individual level behavioral interventions (participant 15)  “we need to use a language we may feel uncomfortable with. i think health equity is really a good topic, is central to this discussion. we need to challenge ourselves to be able to speak complex concepts for everybody to understand.” (participant 13)  “although we have all these wonderful frameworks when we go to the implementation, this varies a lot across countries and within the countries.” (participant 13)  “we need to change the way we speak…. “if you say drug user, it is completely different if you say person who use substances.” (participant 13) | “it is important to form networks… a network of stakeholders with an interest specifically in for instance discrimination and racism and how it impacts health” (participant 1);  “innovation in health equity frameworks should take into consideration different needs. i think there's a real risk that we'll marginalise people even more than they already are and really cut them off services if we've gone completely online first. there is a real risk of moving all services online or making it a digital first approach… if we don't have parity with the offline world.”” (participant 2)  “language changes and evolves and we can't keep using the same language and assuming that the communities are accepting of that language…there was terminology on stis i was using 10 years ago that has now completely changed and evolved” (participant 2)  "we see that when there is an involvement, a real involvement, and since the beginning of all the stakeholders that allow the building of trust, that give to the legitimacy to the work they are doing, and a common ground of, a common language, a common ground of knowledge about the topic, and of interest about what we are supposed to do together." (participant 10)  “you can't do a universal depression service because some medication won't work for others… designing services, you have to have that in mind.. one certainly didn't work for me, but i know it works for others… very difficult to develop anything universal if you want to take a equitable approach because we're not all the same. and i think we need to include this into these frameworks and train doctors.. about the person-centered care.. embedding a person-centred mindset—especially for care leavers—has been challenging at times, particularly when facing feedback like 'everyone’s the same,' but progress has been made…” (participant 2)  “health equity frameworks saying “one in eight people are gay in wale”s, for instance, that's no good because... those one in eight are not exactly the same. if it is one in eight, you've got to treat people as individuals. and that's the beginning of all equity and we should include this into the policies we make” (participant 2)  “especially in hiv, we have this institution of community-led monitoring. there are different methods and different kind of surveys or qualitative studies, you know, different methodologies. but the core is asking clients, service users, what do they think about the service? and then asking, you know, if what is missing, what is missing, if something is not responsive to their needs and preferences, what would be closer to their needs and preferences? let the community-led organizations work with public health. that’s worked sometimes in eastern europe health equity initiatives” (participant 3)  “AI can help analyze data more efficiently and significantly shorten the time between data collection and publication, making timely, high-quality insights more accessible.” (participant 3)  “if you tried something and didn't work in the first year or two, that's not failure. that's great. that's a learning opportunity.” (participant 5)  “digital seems to be the favorite route, but then we have all the counter arguments about people being digitally enabled or being digitally excluded so they don't have enough data. wi-fi drops out, that kind of stuff.  whatever you do, you can't win because someone will criticise whatever you're trying to do to make it more accessible for people.. and again, language barriers are always an issue and the cost of interpreters is phenomenal. digital tools and ai can help with that (participant 9)  “there is a requirement to have people, employee organisations at the heart of designing things, monitoring and evaluation… then you will only see things through your own lens” (participant 15)  “the equity framework that julian tudor hart used… based on knowing the population, knowing their needs, having a dialogue to come to a shared understanding of priorities and action required and then going… fulfilling that and then going round and round the circle.” (participant 15)  “the only possibility that we have to pass through all of this without going to extinction is to give a chance and to listen the ideas that are in the mind of those that have never been in power before.” (participant 13) |
| inner context (org.) | “a lot of governments prioritize [other things], and this also has an impact on the quality of any kind of inclusion strategy” (participant 1)  “i think that's a big structural barrier actually. and it might be different for us because we are nhs as well… we get mixed up with hospitals a lot” (participant 2)  “in spain, many specialized sti clinics were closed, but instead of eliminating them, it would have been better to fully integrate those services into primary care. services like prep, pep, or mpox vaccination should be easily accessible and routinely offered by primary healthcare providers—making them part of everyday care rather than separate, vertical programs” (participant 4)  “statutory bodies like health boards are expected to implement new laws locally, but it’s unclear if they’ve had any real support or training to implement it. often the language is too high-level, full of jargon, and people need clear guidance on what it means in practice, what’s feasible, and what to prioritize amid existing demands. what does this actually mean practically?” (participant 5)  “so i think for me, the work has been around bringing these partners to the table, having clear discussions with the least possible jargon, trying to break it down, use stories, make it clear… in most of my roles, i’ve focused on building awareness and understanding—helping different sectors see their role in health equity. there’s still a lot to do in showing, for example, why business or the transport ministry should care—like how lack of transport in rural areas directly affects access to services and equity overall. (participant 5)  “during the pandemic there was more focus on preparedness and response than on prevention, largely because most countries weren’t ready for the pandemic. this lack of preparation stems from underinvestment in prevention, which is closely tied to equity.. since true prevention means ensuring safety for all.” (participant 8)  “There are no general practitioners in rural areas, and i guess that’s something happening elsewhere in europe too. to promote access, decision-makers are trying to find funding to offer financial incentives for young medical doctors to go to those areas. but that needs public funding. so yeah, accessibility of services depends on funding—but it’s kind of a chicken-and-egg situation, i don't know which comes first.” (participant 10)  “i think that the implementation is the hardest bit about health equity” (participant 12)  “the question of the out-of-pocket payments when you access healthcare and reduction of that share is an important issue because that creates a barrier for those who are in a poorer situation.” (participant 12)  “we as a country are very far from the multi-sector work, the intersectoriality, not only between entities but also within an entity sometimes there is no such dialogue. if i have to say why, there are a reasons that go from, say, competition between subjects, personalities, to lack of..” (participant 14)  “the training of people designing and managing services is the bit that's often missed out… we talk a lot about the frontline professionals, but we don't talk enough about the responsibilities of the organization in terms of addressing structural discrimination, in terms of the way they think about finance… often the way that budgets are set, the way that procurement works is not based on the needs of the people with the biggest burden” (participant 15)  “we lack structures specifically designed to carry out health equity assessments. these tasks are often left undone—not because people don’t care, but because there’s no formal system in place, and existing staff are already overburdened with other responsibilities.” (participant 16)  “organizations often lack clear operational tools or procedures for engaging communities. while some do this intuitively, having visible and structured mechanisms can enhance credibility and improve outcomes.” (participant 17)  “the civil society space is shrinking and increasingly under threat. without political and financial support, organizations that advocate for marginalized populations are at risk of disappearing.” (participant 17)  "it's mostly seen as you work on health equity issues by improving access to healthcare system services... this is also a very targeted way... just to bring those groups closer to the healthcare provision... while when it comes to a kind of seeing it from the social determinants of health perspective... people don't really still kind of either want or can or understand how to bring it closer" (participant 17) | “from mobile units to culturally sensitive care, effective outreach starts with listening to those most affected and addressing their barriers through shared decision-making, across departments and organizations, with a participatory approach” (participant 1)  “you can develop a health equity framework to try to break down those silos. but then it's very important that when you do such a design, you don’t have discussions only within the health system” (participant 2)  “we've got the thing called… the wellbeing of future generations act here in wales… in principle, everyone who's making a new intervention… should be considering the health impacts of that policy.” (participant 2)  “when we think about healthcare, primary and secondary care, communications between primary and secondary care are challenging. we don't have an integrated it system. like these are things, for example, that technology could address”. (participant 5)  “if we go too high level with these frameworks, we lose people. so maybe breaking it down. what are like some key first steps that each person could do at a certain level? like giving them some key action steps basically. and i think that's key moving from theory to action.” (participant 5)  “tele-translation for example, as there is in andalusia, that is a success to integrate migrant people within the healthcare system” (participant 7)  “so, first of all, knowledge, an analysis of the territory, of the demographic health, because there are also realities also in italy, that are small but have different issues.. think of caivano near naples, we are doing some work there, also internally” (participant 14)  “we had examples of experience-based design and they have worked in the groups that they were designed for… where there's a specialist advocacy organization… and a well-resourced third charity… you will get the design that you should really have for everyone.” (participant 15)  “we need to embed equity thinking across all levels of the health system, beginning in university education and continuing through specialized health training. it shouldn’t be an add-on, but part of the foundational training for all health professionals. (participant 16)  “it's just a kind of very often intuitive while i think organizations such as ourselves and the eu let's say health equity framework policies and the processes behind could benefit greatly from having it a bit more central to the functions and the operational structures of organisations.” (participant 17)  "within eurohealthnet, health equity is everything that underpins really our work, the strategic priorities, the annual and multi-annual plans... it's more a compass, a kind of, i'd say, strategic priority. it's like an enabling function for everything else that happens" (participant 17)  "framing, the narratives, and having it little bit targeted to different audiences and governance, but also political spectrum... you talk differently... to greens... or to conservatives, far right... depending on whether you actually want to work with them" (participant 17) |
| outer context (system) | without consistent, rights-based data from national systems, segregated by gender, race and ethnicity, policymaking remains blind to structural inequities—cross-border, high-quality data is essential but still largely missing” (participant 1)  “you need to know what inequities look like in the employment sector or in housing or in education. because those are things that directly impact your ability to be healthy. health equity needs to move beyond health-only approaches” (participant 1)  “we have an advantage in the uk that we have that universal health coverage through the nhs… there's an assumption that it is equitable across the board… i think there are still challenges in that, depending on where you live exactly and the health service access you have. or if you have an rare condition and you have to travel an lot. maybe in theory it is better than countries where public health is detached from the wider health services, but the barriers are still present” (participant 2)  “so i've done work on the 20 mile per hour speed limits, for instance, as well. and you turn up to the policy development meetings and those and people are thinking, why is public health here? we always say 'health in all policies,' but i think we also need to explain 'all policies in health'—how transport, education, and beyond shape health outcomes. so i've done transport, i've done energy in the past, i've done environment, economy now. and it's just having to explain to people why this is a public health matter and why their policy is also a matter of health equity or health inequity. and why we need to address health in all policies. i think that's the biggest barrier to implementing health equity is getting people who are not health professionals to understand what it is and why it matters and what difference it makes for the health of people in the work that they do" (participant 2)  “recently in italy to obtain the healthcare insurance as a foreigner, a migrant, a refugee… if you're a student, have to pay at least 700 euros a year. and if you're an employee or other kind of person, at least 2,000 euros… the decision to increase the price of course affects equitable access to health services. and there is no policy that prevents it.” (participant 3)  “and a lot of the health equity work really requires cross sectoral collaboration. but that kind of work hasn't really been developed yet. there's not a clear pathway to follow at the moment and i think that's causing a lot of confusion as to who's responsible for what, what should they be trying to do” (participant 5)  "advocacy and sensitization of both international and local policymakers is crucial, as they are responsible for writing and funding policies. without proper frameworks, preventable negative health outcomes arise. it's also important to provide evidence—what are the health impacts and costs of unequal access to services? research can help, though a major challenge remains the lack of trust in science among some policymakers, who may prioritize political appeal over evidence-based action." (participant 3)  “there are, of course, in food, the policies need to be coordinated between health, and industry or agriculture and health doesn't get the same attention as the other sectors because the other sectors actually generating resources, health is not, health is using resources. we're seeing health is actually an investment, we're investing for the future” (participant 6)  “i mean the main barriers are the commitment from countries because one health is implying a sort of collaboration among different ministries for instance. so the ministry of health has to work with the ministry of environment, the ministry of agriculture, of veterinary or whatever you want to call it. and when there is no kind of commitment when there is no sort of conditions that now we are living in a world where everything is interconnected..” (participant 8)  "yes, i guess it depends on the you know once more depends on the i guess all of this is closely related to the political will like you know of because many many times marginalized populations either they are not like national so i might there are migrants so they don't have the same rights just in terms of rights they don't have like citizenship or if there is a country where there is no universal health coverage, they don't have access to health care or they don't even have just the right to be there (participant 10)  "but even if they are like nationals but coming from poor communities or people doing things in a different way, i don't know. people like use drugs or sexual minorities or lgbt communities. they are considered as minorities, so they are not necessarily seen by everyone like entitled to the same sort of things that common people or normal people like, you know." (participant 10)  “dealing with commercial determinants of health, you think about alcohol and tobacco, they are kind of two major kind of things which kind of relate to inequalities in finland, for example, or health inequalities and social inequalities. (participant 12)  “i think it's much more about political will.” (participant 12)  “political will is really important, but it's not just about politicians, because you often get the politicians on board, but the civil servants are not on board, or the civil servants in one part of the country are on board, but not the part that you need to be board… and you could only ever get two out of the three or four to agree at any one time.” (participant 15)  “there are always calls for things like charges? means testing, restricting eligibility, fragmentation, all the things that we know are really unhelpful… but these zombies keep arriving. privatisation, private sector money, always they're in the background.” (participant 15)  “it’s very easy for these implementation frameworks to slip into just solving immediate problems… not constantly thinking about how do we redesign the system.”(participant 15)  “in our country, access to health is uneven because the legal framework is open to interpretation. depending on the political ideology of the regional government, access might be easier or harder. this discretionary application of laws has led to inequality, particularly affecting migrants and roma communities.” (participant 16)  “i think the main barrier is really again in the structure of the political processes because people elected are elected for a few years, five years for example, while public health interventions show results on the longer term.” (participant 13)  “we need to educate people to have the minimum health literacy to read the results in the right way.” (participant 13)  “if you increase the prohibition and the penalties, what do you obtain? an increase in the prices, more search for illegal substances.” (participant 13) | “it’s important to have mechanisms such as the national roma contact points, there's infrastructure to some degree in place. there's reporting being done at least on it” (participant 1);  “health equity can’t be achieved through eu health policy or national health policy alone—it's too limited. real progress requires cross-sectoral action, engaging employment, housing, education, and more, because health is shaped by far more than healthcare systems. it’s about breaking the silos. everything impacts your health, not only the health system” (participant 1)  “we try to translate the needs of civil society into concrete policy recommendations, feeding them directly into eu strategies on anti-racism, gender, lgbtiq, and roma health." (participant 1)  “if you put on the table the good practices so that people can copy, in some way, things they do in other places, i think it helps people to be encouraged.” (participant 11)  “we've got the thing called… the wellbeing of future generations act here in wales… in principle, everyone who's making a new intervention… should be considering the health impacts of that policy.” (participant 2)  “important to have some good practice guidelines across countries in eu and uk of what good looks like” (aj)  “this is an extreme case, but the dynamics are common: resistance doesn't only come from doctors, but also from public health policymakers who face pressure from the public—questions like "why fund gay men instead of a new pediatric ward?" even supportive allies must tread carefully to avoid backlash or being replaced by more conservative voices. it’s often more strategic to work quietly—through training and internal reforms—than to push for highly visible public actions that risk political pushback.” (participant 3)  “if everything else is in place and there is no political will, then nothing will work. but if there is political will, then all the rest can happen” (participant 3)  “and on the other hand, the public health is becoming, it became more and more a political issue. know, just the, and it's also utilizing a negative way as a political.” (participant 8)  “i think that is a significant part of it is we need to put party politics aside and look at what's actually good for the nation.” (participant 9)  “spain has a highly decentralized system with strong regional autonomy. what’s often missing is better exchange of good practices between autonomous regions and cross-border learning at the eu level.” (participant 4)  “when organizations design and implement policies in a holistic way, integrating cross-sector collaboration and aligning with health equity goals, they are more effective. clear training and support help ensure staff understand and implement these principles.” (participant 17)  “you need to build trust, different kinds of trust. trust that you know you're there for the long haul, trust between just different actors, getting people to talk to each other, i think that's already a step forward” (participant 5)  “at the ministry, we’ve developed an equity training course for staff across various general directorates—including pharmacy, care quality, and health services. this internal education effort helps integrate equity principles across departments that may not have previously considered them.” (participant 16)  “trust is important, because for instance, in the case of the covid-19, we have seen that sharing the data, know, ministries are sharing the data, this was not happening. and sharing data is crucial for health equity.. so good governance and leadership should be prioritized across countries” (participant 8)  “AMR it's requesting a kind of multi-sectorial approach because it's not just human health, it's also animal health and it's also environment you know and now we have also more data, we have the scientific evidence. and policymakers have to frame AMR within a multidisciplinary and interdisciplinary approach… instead of focusing only on human health, as it’s still the tendency at WHO for instance” (participant 8)  “if we make good policies for entire population, improves what you do with specific populations… doing things for only, say migrants, sometimes are not transversal or longitudinal” (participant 7)  “and regarding leadership, we need to rethink what it means today—especially in one health. we need collaborative leadership, emotional intelligence, not just traditional top-down models. we need to break down these walls, stop working in silos.” (participant 8)  “local policy or even national policy on things like food marketing has a huge impact on people's individual choices but there is minimal legislation and minimal will to legislate around that and that again is tied up with profits you know all of that so the commercial determinants of health are significant and we don't take action against those kind of areas so we are creating environments for people, psychological environments for people where the choices are harder” (participant 9)   | “intersectoral collaboration is essential, especially when working beyond the health ministry. i’ve had positive experiences with environmental ministries on integrating health equity into environmental impact assessments. these dialogues help embed health considerations into non-health sectors.” (participant 16) | | --- |   “national governments are responsible for ensuring health equity. are ensuring that they're required and they should be ensuring that the municipalities have the resources and the capacities to actually do that.. at national level, should... check that decentralisation and cross-subsidisation is such that the poorest municipalities and the most remote ones have more resources to address health.” (participant 12)  “so this seems very important to i don't know, this is bit naive if you want pass the term think the eu should have more courses for public officials who deal with public those who work for the ministry, who need to know what the eu is on certain issues.” (participant 14)  “the european parliament has a role to live up to both the spirit and the text of its underpinning legislation in terms of the right to health for all… require that health and human rights are monitored and that people are held accountable… and scrutinise the work of the european commission.” (participant 15)  “in scotland… we have a very good national health services act, which helps all of the health system, the politicians and so on… to work for improving the physical and mental health of the population and requires organizations to work together.” (participant 15)  “so what's the role for the eu level and the national government in the eu? again, it's that this economics of scale very often in terms of funding, but that has to be complementary to national budgets towards it as well.” (participant 17) |
| societal context | “when health systems and policies are built around the standard of an older white male, anyone who deviates—by gender, race, disability, or intersecting identities—faces compounded inequities” (participant 1)  "definitely, definitely. i guess this is the background of all this. i don't think that we can find another better explanation. the core of the thing is that there are all these mainstream mindset, which is inspired by colonialism, by patriarchy and... and a capitalism because everything is like about getting more money or not wasting money or et cetera." (participant 10)  “structural inequities—like anti-gypsyism, geographic isolation, poor housing, and exclusion from education or employment—directly harm health and limit access to care. these systemic barriers shape who gets to be healthy and who doesn’t, and they exist to varying degrees across all european countries” (participant 1)  “structural obstacles to effective health equity implementation persist due to non-binding strategies, lack of accountability, and absent monitoring frameworks. the eu has limited competence in health—mostly reduced to funding support, best practice exchange, and soft nudging—while real change depends on national governments’ political will” (participant 1)  “take tajikistan as an example: it has some of the best prep guidelines i’ve seen—comprehensive, including clear counseling advice. but only about 100–150 people are on prep, mostly sero-discordant couples. why? the country faces major challenges: limited funding for hiv, no openly active community organizations due to restrictive laws and stigma, and a repressive civil society space. while officials accept donor-written guidelines, they avoid public actions supporting key populations like msm, sex workers, or trans people” (participant 3)  “in the eu, health equity efforts began in silos but have shifted toward more cross-sectoral approaches, guided by the principle of health in all policies. however, challenges persist due to unclear roles in transversal actions, competition for funding..with the eu often acting more as a compliance checker than an implementation leader.” (participant 4)  “health isn't just the health care system and health care providers. maybe 20 % of health and wellbeing sits in the health care system and the majority of it sits outside. we should imporve access to all of these other essential services, making people more, you know, being able to socialize more, avoiding isolation, accessing green spaces” (participant 5)  “in the past two years, economic crises have made it harder for even middle-class populations to make ends meet. as wealth gaps widen within countries, prioritizing and distributing resources becomes increasingly difficult, especially with growing marginalized groups.” (participant 4)  “the main obstacles to food environment policies in europe are the strong opposition from actors who are maximizing their profits, particularly the food industry. although there have been some good attempts in countries like france on labeling or portugal on marketing restrictions and sugar taxes, these remain isolated and haven't become mainstream. policies like nutri-score are strongly opposed by countries like italy. there are also issues around the design of these policies—it's not just about resources, as many food environment policies don’t cost much, but about capacity and prioritization, especially for services like obesity treatment or doctor training, which most countries don’t currently prioritize. (participant 6)  “the number of people displaced is exponentially increasing because of the climate change and the ecological catastrophes, because of the wars, because of the diverse economical situation, level of unemployment. health equity frameworks should account for these” (participant 13)   | “currently, eu political priorities focus on defense, security, and competitiveness. health equity is often not framed within these dominant agendas, which reduces visibility and political support.” (participant 17) | | --- |   “we still lack a law that guarantees universality. the cuts from 2012 in spain left many people out, and despite efforts, these exclusions persist. we need structural changes to ensure equal and universal access to healthcare.” (participant 16)  “sustainable funding is a major issue. at both eu and member state levels, resources for underserved populations are shrinking, even as demand increases. this financial gap is growing and threatens equity efforts.” (participant 17)  “equity is something that is quite fluid, think about it. those who are vulnerable, who are suffering from inequality can oscillate, it is not rigid. when some migrants arrives, they might be better than old locals or italian who live in situations of marginalization in neighborhoods like caivano or other areas.” (participant 14)  “you're always, always, always pushing uphill… despite the efforts of individual professionals and the aspirations of individuals and even when you have a system that's intended to address inequity” (participant 15)  “alongside the narrowing in the societal perspective in terms of costing and investment and measuring benefit, there's another uphill struggle which is about seeing who's not there.” (participant 15) | “health equity frameworks must address directly and in detail racism, xenophobia, and other structural inequities as fundamental determinants of health” (participant 1)  “through networks like disqo and the roma health network, we tackle discrimination as a fundamental health determinant by connecting grassroots voices to eu policymaking… the eu’s union of equality strategies, the eu roma strategic framework, the anti-racism startegy offes a solid foundation for addressing intersecting inequities—strategies on racism, gender, lgbtiq rights, disability, and roma inclusion create entry points to embed health equity, even if they remain non-binding.”. (participant 1)  “in the eu, health equity efforts began in silos but have shifted toward more cross-sectoral approaches, guided by the principle of health in all policies. however, challenges persist due to unclear roles in transversal actions, competition for funding..with the eu often acting more as a compliance checker than an implementation leader.” (participant 4)  “so, unfortunately, not always in europe we have active parliamentarian groups who, for example, work across different parties and across different countries to promote that agenda. I definitely, think that a European Parliament really work should happen at that level. that's where the lobbyism is actually undermining all those efforts.” (participant 6)  “so in that sense, public health is right there—at the intersection. it's about addressing overlapping inequities faced by groups like migrants, lgbtqi+ people, women, and the poor. but it’s not just about one identity—i might be a woman, but i’m not socially disadvantaged. being a woman in granada isn’t the same as being a woman in rabat. that’s why improving broad policies—urban planning, public spaces, transport, housing, employment—can reduce inequalities for everyone. (participant 7)  “so the analysis of context is a very important a correct planning is above all, as they say, bringing to knowledge of everything, politicians. (participant 14)  “in scotland… the equity impact assessment… takes account of the failure scotland duty which is in the duty in terms of people with fewer material and social resources… it mitigates the worst of the tendency for things to be designed by middle-aged middle-class men with a university education.” (participant 15)  “if you think about the institution as a building… systems rely on individuals to be the kind of cement that holds the blocks together… having the institution take responsibility for relationship with the community.” (participant 15)  “the eu can support health equity by funding knowledge exchange, capacity building, and infrastructure development. it can help national, regional, and local authorities design and monitor effective, multisectoral interventions.” (participant 17)  “there is this wonderful movement that is called one health that supports that health in the planet is one, whether it affects animals, plants, human beings.”(participant 13) |

|  |
| --- |

# Additional file 2: COREQ checklist.

Format: DOCX.
Description: Completed 32-item COREQ checklist documenting reporting standards for this qualitative study.

Developed from:
Tong A, Sainsbury P, Craig J. Consolidated criteria for reporting qualitative research (COREQ): a 32-item checklist for interviews and focus groups. International Journal for Quality in Health Care. 2007. Volume 19, Number 6: pp. 349 – 357.

**MANUSCRIPT TITLE:** **“You don’t do it for them, you do it with them:” Policymaker Perspectives on Implementing Health Equity Frameworks across the EU and UK**

| **No. Item** | **Guide questions/description** | **Reported on Page #** |
| --- | --- | --- |
| **Domain 1: Research team and reflexivity** |  |  |
| *Personal Characteristics* |  |  |
| 1. Inter viewer/facilitator | Which author/s conducted the interview or focus group? | Methods |
| 2. Credentials | What were the researcher’s credentials? (E.g. PhD, MD) | Methods, Declarations (Author’s contributions) |
| 3. Occupation | What was their occupation at the time of the study? | Methods, Declarations (Reflexivity and Author’s contributions) |
| 4. Gender | Was the researcher male or female? | Declarations (author’s contributions) |
| 5. Experience and training | What experience or training did the researcher have? | Methods (reflexivity) |
| *Relationship with participants* |  |  |
| 6. Relationship established | *Was a relationship established prior to study commencement?*  . | Methods (participant recruitemen) |
| 7. Participant knowledge of the interviewer | *What did the participants know about the researcher? (e.g. personal goals, reasons for doing the research).* | Methods (participant recruitement) |
| 8. Interviewer characteristics | *What characteristics were reported about the interviewer/facilitator? (e.g. Bias, assumptions, reasons and interests in the research topic)* | Methods (Reflexivity) |
| **Domain 2: Study design** |  |  |
| *Theoretical framework* |  |  |
| 9. Methodological orientation and Theory | *What methodological orientation was stated to underpin the study? (e.g. grounded theory, discourse analysis, ethnography, phenomenology, content analysis).* | Methods (study design and setting and Health Equity Implementation Framework) |

| *Participant selection* |  |  |
| --- | --- | --- |
| 10. Sampling | *How were participants selected? (e.g. purposive, convenience, consecutive, snowball)* | Methods (participant recruitement and sampling) |
| 11. Method of approach | *How were participants approached? (e.g. face- to-face, telephone, mail, email)* | Methods (participant recruitement and sampling) |
| 12. Sample size | *How many participants were in the study?* | Methods (participant recruitement and sampling) |
| 13. Non-participation | *How many people refused to participate or dropped out? Reasons?* | Methods (participant recruitement and sampling) |
| *Setting* |  |  |
| 14. Setting of data collection | *Where was the data collected? (e.g. home, clinic, workplace)* | Methods (Study setting) |
| 15. Presence of non- participants | *Was anyone else present besides the participants and researchers?* | Methods (Study setting) |
| 16. Description of sample | *What are the important characteristics of the sample? (e.g. demographic data, date)* | Results (Table 2) |
| *Data collection* |  |  |
| 17. Interview guide | *Were questions, prompts, guides provided by the authors? Was it pilot tested?* | Methods and appendix 7 |
| 18. Repeat interviews | *Were repeat interviews carried out? If yes, how many?* | Methods |
| 19. Audio/visual recording | *Did the research use audio or visual recording to collect the data?* | Methods |
| 20. Field notes | *Were field notes made during and/or after the interview or focus group?* | Methods (reflexivity) |
| 21. Duration | *What was the duration of the inter views or focus group?* | Methods |
| 22. Data saturation | Was data saturation discussed? | Methods |
| 23. Transcripts returned | *Were transcripts returned to participants for comment and/or correction?* | Methods (ethics and confidentiality) |
| **Domain 3: analysis and findings** |  |  |
| *Data analysis* |  |  |
| 24. Number of data coders | How many data coders coded the data? | Methods |

| 25. Description of the coding tree | *Did authors provide a description of the coding tree?* | Methods and appendix (tables) |
| --- | --- | --- |
| 26. Derivation of themes | *Were themes identified in advance or derived from the data?* | Methods |
| 27. Software | *What software, if applicable, was used to manage the data?* | Methods |
| 28. Participant checking | *Did participants provide feedback on the findings?* | Methods |
| *Reporting* |  |  |
| 29. Quotations presented | *Were participant quotations presented to illustrate the themes/findings? Was each*  *quotation identified? (e.g. participant number)* | Methods and results |
| 30. Data and findings consistent | *Was there consistency between the data presented and the findings?* | Results |
| 31. Clarity of major themes | *Were major themes clearly presented in the findings?* | Results and discussion |
| 32. Clarity of minor themes | Is there a description of diverse cases or discussion of minor themes? | Results |
